# Supplementary material
Source: publisher site journal article supplement (https://www.degruyterbrill.com/publication/isbn/9783110340259/downloadAsset/9783110340259_Inhalt.pdf)
Supplement: Supplementary file 1 [file 9783110340259_Inhalt.pdf]

# Inhalt

**Autorenverzeichnis — V**

**Vorwort — VII**

**Hinweise zur Benutzung — XXIII**

**Abkürzungsverzeichnis — XXV**

## **Teil I Einführung in die Informatik**

### **1 Datentypen und Datenstrukturen — 3**

- 1.1 Bits und Bytes — 3
- 1.2 Elementare Datentypen — 4
  - 1.2.1 Datentypen zur Darstellung natürlicher Zahlen — 5
  - 1.2.2 Datentypen zur Darstellung ganzer Zahlen (Integer) — 7
  - 1.2.3 Datentypen zur Darstellung reeller Zahlen (Float, Double) — 7
  - 1.2.4 Datentypen zur Darstellung von Buchstaben und Zeichen (Character) — 9
  - 1.2.5 Datentypen zur Darstellung von Wahrheitswerten (Boolean) — 11
- 1.3 Zeigertypen (Referenzen) — 11
- 1.4 Strukturierte Standard-Datentypen — 12
  - 1.4.1 Arrays (Felder, Listen, Vektoren) — 13
  - 1.4.2 Strings — 14
- 1.5 Datenstrukturen — 14
  - 1.5.1 Einfach verkettete Listen — 15
  - 1.5.2 Modifikationen einfach verketteter Listen — 16
  - 1.5.3 Graphen — 17
  - 1.5.4 Bäume — 22
  - 1.5.5 Heaps — 24
  - 1.5.6 Hash-Tabelle — 26

### **2 Modelle und Algorithmen — 29**

- 2.1 Petri-Netze — 29
- 2.2 Unified Modeling Language (UML) — 31
  - 2.2.1 Anwendungsfalldiagramm — 32
  - 2.2.2 Klassendiagramm — 34
  - 2.2.3 Zustandsdiagramm — 37
  - 2.2.4 Sequenzdiagramm — 39

|          |                                                                      |           |
|----------|----------------------------------------------------------------------|-----------|
| 2.3      | Algorithmen —                                                        | 40        |
| 2.3.1    | Einführung —                                                         | 40        |
| 2.3.2    | Rekursion —                                                          | 43        |
| 2.4      | Sortieralgorithmen —                                                 | 43        |
| 2.4.1    | Wichtige Eigenschaften —                                             | 44        |
| <b>3</b> | <b>Einführung in die objektorientierte Programmierung mit Java —</b> | <b>55</b> |
| 3.1      | Programmieren lernen —                                               | 55        |
| 3.1.1    | Java und andere Programmiersprachen —                                | 55        |
| 3.2      | Einführung in die Objektorientierung —                               | 56        |
| 3.2.1    | <i>Hello World</i> – Das allererste Java-Programm —                  | 58        |
| 3.2.2    | Stilfragen und Kommentare —                                          | 60        |
| 3.2.3    | Variablen – Initialisierung, Deklaration, Casting —                  | 61        |
| 3.2.4    | Operatoren —                                                         | 64        |
| 3.3      | Kontrollstrukturen —                                                 | 66        |
| 3.3.1    | Verzweigungen —                                                      | 66        |
| 3.3.2    | Schleifen —                                                          | 70        |
| 3.3.3    | Sprünge —                                                            | 72        |
| 3.3.4    | Eine eigene Klasse schreiben —                                       | 73        |
| 3.4      | Mehr über Klassen —                                                  | 75        |
| 3.4.1    | Vererbung —                                                          | 75        |
| 3.4.2    | Abstrakte Klassen —                                                  | 76        |
| 3.4.3    | Mehrfachvererbung durch Schnittstellen —                             | 77        |
| 3.5      | Pakete —                                                             | 78        |
| 3.6      | Zugriffsmodifikatoren —                                              | 80        |
| 3.7      | In Java ist alles Klasse —                                           | 80        |

## **Teil II Organisation und Regulation im Gesundheitswesen**

|          |                                                                           |           |
|----------|---------------------------------------------------------------------------|-----------|
| <b>4</b> | <b>Einführung in die Gesundheitsökonomie —</b>                            | <b>85</b> |
| 4.1      | Grundbegriffe der Ökonomie und Gesundheitsökonomie —                      | 86        |
| 4.1.1    | Effizienz —                                                               | 86        |
| 4.1.2    | Marktgleichgewicht und Marktversagen —                                    | 86        |
| 4.2      | Einführung in die Sozialversicherungs- und<br>Gesundheitssysteme —        | 88        |
| 4.2.1    | Versicherung und Sozialversicherung —                                     | 88        |
| 4.2.2    | Prinzipien der Finanzierung von Gesundheitssystemen —                     | 89        |
| 4.2.3    | Marktversagen der Krankenversicherungen —                                 | 90        |
| 4.2.4    | Steuerung des Verhaltens von Leistungsanbietern im<br>Gesundheitssystem — | 90        |

|          |                                                                                        |            |
|----------|----------------------------------------------------------------------------------------|------------|
| 4.3      | Organisation des deutschen Gesundheitswesens —                                         | <b>91</b>  |
| 4.3.1    | Selbstverwaltung des deutschen Gesundheitswesens —                                     | <b>92</b>  |
| 4.3.2    | Krankenversicherungen in Deutschland —                                                 | <b>92</b>  |
| 4.3.3    | Weitere wichtige Organisationen im deutschen<br>Gesundheitswesen —                     | <b>96</b>  |
| 4.3.4    | Ambulanter Sektor —                                                                    | <b>97</b>  |
| 4.3.5    | Stationärer Sektor —                                                                   | <b>98</b>  |
| 4.3.6    | Neue Versorgungsformen —                                                               | <b>99</b>  |
| 4.4      | Kostenverteilung und Vergütung im deutschen<br>Gesundheitswesen —                      | <b>100</b> |
| 4.4.1    | Einführung und Hintergrund —                                                           | <b>100</b> |
| 4.4.2    | Einfluss auf die Gesamtkosten im Gesundheitssystem —                                   | <b>101</b> |
| 4.4.3    | Vergütung im ambulanten Sektor —                                                       | <b>102</b> |
| 4.5      | DRG-System: Vergütung im stationären Sektor —                                          | <b>102</b> |
| 4.5.1    | Geschichtlicher Hintergrund und gesetzliche Grundlagen —                               | <b>102</b> |
| 4.5.2    | Aufgaben und Ziele des DRG-Systems —                                                   | <b>103</b> |
| 4.5.3    | Abrechnung im DRG-System —                                                             | <b>104</b> |
| 4.6      | Arzneimittelmarkt —                                                                    | <b>106</b> |
| 4.6.1    | Arzneimittelzulassung —                                                                | <b>107</b> |
| 4.6.2    | Preisfindung und -regulierung —                                                        | <b>108</b> |
| 4.6.3    | Nutzenbewertung neuer Arzneimittel —                                                   | <b>110</b> |
| <b>5</b> | <b>Qualitätsmanagement im Gesundheitswesen —</b>                                       | <b>113</b> |
| 5.1      | Hintergrund —                                                                          | <b>113</b> |
| 5.2      | Gesetzliche Vorgaben erleichtern einen Qualitätswettbewerb —                           | <b>115</b> |
| 5.3      | Qualitätsmanagement im Gesundheitswesen: Angewandte Modelle<br>und Normen —            | <b>117</b> |
| 5.4      | DIN EN 15224 als neue QM-Norm für das Gesundheitswesen —                               | <b>118</b> |
| 5.4.1    | Verantwortung der Leitung —                                                            | <b>119</b> |
| 5.4.2    | Management der Ressourcen —                                                            | <b>119</b> |
| 5.4.3    | Prozessmanagement —                                                                    | <b>119</b> |
| 5.4.4    | Messung, Analyse und Verbesserung —                                                    | <b>120</b> |
| 5.5      | Praktische Hinweise zur erfolgreichen Einführung eines<br>Qualitätsmanagementsystems — | <b>120</b> |
| 5.5.1    | Von Anfang an Mitarbeiter einbinden —                                                  | <b>121</b> |
| 5.5.2    | Vom Beobachter zum Prozesseigner: Jeder Prozess hat einen<br>Verantwortlichen —        | <b>121</b> |
| 5.5.3    | Regelmäßige periodische Bewertung der Abläufe —                                        | <b>122</b> |
| 5.5.4    | Prozessmanagement zur prospektiven Fehlervermeidung —                                  | <b>122</b> |
| 5.6      | Umfassendes Risikomanagement als wichtiger Bestandteil<br>des Qualitätsmanagements —   | <b>123</b> |

- 5.7 Ausblick — 124
- 5.8 Anhang: Gesetzlich vorgeschriebene Qualitätssicherung — 125

## **Teil III Messwerte, Signale und Bilder**

### **6 Statistik und Biometrie — 131**

- 6.1 Grundbegriffe der Statistik und Wahrscheinlichkeit — 131
  - 6.1.1 Häufigkeiten und Darstellung von Daten — 132
  - 6.1.2 Skalen und Transformationen — 136
- 6.2 Lage- und Streuungsmaße — 137
  - 6.2.1 Lagemaße — 138
  - 6.2.2 Streuungsmaße — 140
  - 6.2.3 Stichproben — 142
- 6.3 Wahrscheinlichkeit und Wahrscheinlichkeitsverteilungen — 144
  - 6.3.1 Einführung in den Wahrscheinlichkeitsbegriff — 144
  - 6.3.2 Kombinatorik — 148
  - 6.3.3 Verteilungs- und Dichtefunktionen — 149
  - 6.3.4 Wichtige Verteilungen — 150
  - 6.3.5 Diskrete Wahrscheinlichkeitsverteilungen (Auswahl) — 153
  - 6.3.6 Rechenregeln für Erwartungswerte — 155
- 6.4 Zusammenhänge — 156
  - 6.4.1 Scatterplot (Streudiagramme) — 156
  - 6.4.2 Kontingenzanalyse — 157
  - 6.4.3 Spezialfall zweidimensionale Merkmale: Vierfeldertafel — 158
  - 6.4.4 Korrelation und Regression — 160
- 6.5 Testverfahren — 164
  - 6.5.1 Definition des Konfidenzintervalls — 164
  - 6.5.2 Hypothesen und Testausrichtung — 166
  - 6.5.3 Testdurchführung — 166
  - 6.5.4 Testverfahren bei normalverteilter Grundgesamtheit — 167
  - 6.5.5 Verteilungsfreie Testverfahren — 167

### **7 Biosignalverarbeitung — 171**

- 7.1 Einführung — 171
- 7.2 Grundlegende Operationen und wichtige Funktionen — 173
  - 7.2.1 Definitionen — 173
  - 7.2.2 Einfache Signaloperationen — 174
  - 7.2.3 Delta-Funktion (Dirac-Impuls) und Kammfunktion — 174
  - 7.2.4  $\delta$ -Kamm — 175
  - 7.2.5 Komplexe Zahlen — 176
  - 7.2.6 Kreisfrequenz, Frequenz und Winkel  $\varphi$  — 176

|          |                                                                   |            |
|----------|-------------------------------------------------------------------|------------|
| 7.3      | Signalakquisition und Digitalisierung —                           | 178        |
| 7.4      | Signale, Systeme und Transformationen —                           | 180        |
| 7.4.1    | Faltung —                                                         | 180        |
| 7.4.2    | Lineare Systeme —                                                 | 182        |
| 7.4.3    | Faltungssatz —                                                    | 183        |
| 7.4.4    | Finite Impuls Response (FIR) und Infinite Impuls Response (IIR) — | 183        |
| 7.4.5    | Korrelation —                                                     | 184        |
| 7.4.6    | Signaltransformationen —                                          | 186        |
| 7.4.7    | Auto- und Kreuzkorrelation, Kovarianz —                           | 187        |
| 7.4.8    | Fourier-Reihenentwicklung —                                       | 188        |
| 7.5      | Fourier-Transformation —                                          | 189        |
| 7.5.1    | Fourier-Transformation —                                          | 189        |
| 7.5.2    | Diskrete Fourier-Transformation (DFT) —                           | 191        |
| 7.5.3    | Laplace-Transformation —                                          | 192        |
| 7.5.4    | Eigenschaften der Fourier-Transformation —                        | 192        |
| 7.5.5    | Ergänzende Bemerkungen und Zusammenfassung —                      | 196        |
| 7.5.6    | Abtasttheorem —                                                   | 197        |
| 7.5.7    | LTI-System —                                                      | 198        |
| 7.6      | Systeme und Übertragungsfunktionen —                              | 198        |
| 7.6.1    | Übertragungsfunktion —                                            | 198        |
| 7.7      | Filter —                                                          | 202        |
| 7.7.1    | Funktionen und Eigenschaften von Filtern —                        | 202        |
| 7.7.2    | Durchlass- und Sperrbereich verschiedener Filterarten —           | 204        |
| 7.7.3    | 3-dB-Grenzfrequenz —                                              | 204        |
| 7.7.4    | Filterarten —                                                     | 205        |
| 7.7.5    | Medianfilter —                                                    | 205        |
| 7.7.6    | Lineare Filter —                                                  | 206        |
| 7.7.7    | Mittelwertfilter —                                                | 207        |
| 7.7.8    | Glättungsfilter —                                                 | 208        |
| 7.8      | Ausblick —                                                        | 208        |
| <b>8</b> | <b>Bildverarbeitung —</b>                                         | <b>211</b> |
| 8.1      | Grundbegriffe —                                                   | 211        |
| 8.1.1    | Information —                                                     | 211        |
| 8.1.2    | Redundanz —                                                       | 211        |
| 8.1.3    | Signalverarbeitungskette —                                        | 212        |
| 8.1.4    | Bildwahrnehmung des Menschen —                                    | 212        |
| 8.1.5    | Rastergrafik vs. Vektorgrafik —                                   | 212        |
| 8.1.6    | Pixel —                                                           | 213        |
| 8.1.7    | Farbräume —                                                       | 213        |
| 8.2      | Grundlagen der Bildverarbeitung —                                 | 214        |
| 8.2.1    | Maßnahmen der Bildverbesserung —                                  | 215        |

|       |                                                 |     |
|-------|-------------------------------------------------|-----|
| 8.2.2 | Maßnahmen der Bildveränderung —                 | 215 |
| 8.2.3 | Digitalisierung = Diskretisierung von Bildern — | 216 |
| 8.2.4 | Abtastfehler —                                  | 217 |
| 8.2.5 | Histogramme —                                   | 218 |
| 8.3   | Kompression und Transformation —                | 218 |
| 8.3.1 | Verlustfreie Kompression —                      | 219 |
| 8.3.2 | Verlustbehaftete Kompression —                  | 220 |
| 8.3.3 | Diskrete Kosinustransformation (DCT) —          | 221 |
| 8.3.4 | Beispiel einer DCT am JPG-Bild —                | 221 |
| 8.4   | Filter —                                        | 226 |
| 8.5   | Mustererkennung —                               | 229 |
| 8.5.1 | Barcode —                                       | 229 |
| 8.5.2 | OCR – Optical Character Recognition —           | 229 |
| 8.5.3 | Schwellenwertverfahren —                        | 230 |
| 8.5.4 | Merkmalsextraktion —                            | 230 |
| 8.6   | Computertomographie —                           | 230 |

## **Teil IV Daten und ihre Verarbeitung**

|          |                                                            |            |
|----------|------------------------------------------------------------|------------|
| <b>9</b> | <b>Datenbanken —</b>                                       | <b>235</b> |
| 9.1      | Einführung —                                               | 235        |
| 9.1.1    | Datenbankentwurf —                                         | 236        |
| 9.1.2    | Anforderungsanalyse —                                      | 237        |
| 9.1.3    | Konzeptioneller Entwurf: Entity-Relationship-Model (ERM) — | 238        |
| 9.1.4    | Unified Modeling Language (UML) —                          | 240        |
| 9.1.5    | Sichten —                                                  | 241        |
| 9.1.6    | Datenbank-Konflikte —                                      | 241        |
| 9.2      | Logisches Schema und Datenbankmodelle —                    | 242        |
| 9.2.1    | Hierarchisches Modell —                                    | 243        |
| 9.2.2    | Relationales Modell —                                      | 243        |
| 9.2.3    | Transformationsregeln ERM – relationales Datenbankmodell — | 245        |
| 9.3      | Normalisierung —                                           | 246        |
| 9.3.1    | 1. Normalform —                                            | 246        |
| 9.3.2    | 2. Normalform —                                            | 247        |
| 9.3.3    | 3. Normalform —                                            | 248        |
| 9.4      | Relationale Algebra —                                      | 248        |
| 9.4.1    | Objektorientiertes/objektrelationales Modell —             | 248        |
| 9.4.2    | Datendefinition —                                          | 249        |
| 9.4.3    | Physischer Entwurf —                                       | 250        |
| 9.4.4    | Implementierung und Wartung —                              | 250        |

|       |                                      |     |
|-------|--------------------------------------|-----|
| 9.5   | Datenbank-Managementsysteme (DBMS) — | 250 |
| 9.5.1 | Aufgaben und Aufbau eines DBMS —     | 250 |
| 9.5.2 | Beispiele für DBMS —                 | 252 |
| 9.6   | Einführung in SQL —                  | 252 |
| 9.6.1 | Data Definition Language (DDL) —     | 252 |
| 9.6.2 | Data Query Language (DQL) —          | 257 |
| 9.6.3 | Data Manipulation Language (DML) —   | 261 |
| 9.6.4 | Data Control Language (DCL) —        | 262 |

## **10 Rechnernetze — 265**

|        |                                                              |     |
|--------|--------------------------------------------------------------|-----|
| 10.1   | Organisation —                                               | 265 |
| 10.1.1 | Netzwerk-Topologien —                                        | 265 |
| 10.1.2 | Übertragungsmedien —                                         | 268 |
| 10.1.3 | Infrastrukturgeräte —                                        | 268 |
| 10.1.4 | Ausdehnung von Netzwerken —                                  | 271 |
| 10.2   | OSI-Modell —                                                 | 272 |
| 10.2.1 | Schichten im OSI-Modell —                                    | 273 |
| 10.2.2 | TCP/IP-Schichtenmodell —                                     | 274 |
| 10.3   | Technologien und Protokolle —                                | 275 |
| 10.3.1 | Adressierung von Quell- und Zielsystem —                     | 275 |
| 10.3.2 | Fehlerkorrektur —                                            | 276 |
| 10.3.3 | Flusskontrolle —                                             | 276 |
| 10.3.4 | Layer 1 (Bitübertragungsschicht) bis 2 (Sicherungsschicht) — | 276 |
| 10.3.5 | Layer 3 (Vermittlungsschicht) —                              | 278 |
| 10.3.6 | Layer 4 (Transportschicht) —                                 | 280 |
| 10.3.7 | Layer 5 bis 7 (Sitzungs- bis Anwendungsschicht) —            | 281 |
| 10.3.8 | Virtual Private Networks (VPN) —                             | 288 |

## **11 Informationssicherheit — 291**

|        |                                                          |     |
|--------|----------------------------------------------------------|-----|
| 11.1   | Einführung —                                             | 291 |
| 11.1.1 | Definitionen und Begriffsbestimmungen —                  | 291 |
| 11.1.2 | Anonymisierung und Pseudonymisierung —                   | 292 |
| 11.1.3 | Ebenen der Datentransaktionen —                          | 293 |
| 11.1.4 | Kryptographie (Verschlüsselung) und Kryptoanalyse —      | 294 |
| 11.2   | Gesetzliche Regelungen des Datenschutzes —               | 295 |
| 11.2.1 | Historie —                                               | 295 |
| 11.2.2 | Bundesdatenschutzgesetz (BDSG) —                         | 295 |
| 11.2.3 | Informations- und Kommunikationsdienste Gesetz (IuKDG) — | 297 |
| 11.2.4 | Telekommunikationsgesetz (TKG) —                         | 297 |
| 11.2.5 | Telemediengesetz (TMG) —                                 | 298 |
| 11.2.6 | Sozialgesetzbuch V (SGB V) —                             | 298 |
| 11.2.7 | Strafgesetzbuch (StGB) —                                 | 299 |

|           |                                                                                        |            |
|-----------|----------------------------------------------------------------------------------------|------------|
| 11.2.8    | Rechtliche Problembereiche —                                                           | <b>299</b> |
| 11.2.9    | Datenschutzregelungen beim Einsatz eines Praxis- bzw. Krankenhausinformationssystems — | <b>300</b> |
| 11.2.10   | Spezialfall Klinische Forschung —                                                      | <b>302</b> |
| 11.2.11   | Spezialfall Telemedizin —                                                              | <b>302</b> |
| 11.3      | Datensicherheit: Praktische Aspekte —                                                  | <b>303</b> |
| 11.3.1    | Lebenszeiten von typischen Medien —                                                    | <b>303</b> |
| 11.3.2    | Praktische Durchführung der Datensicherung —                                           | <b>304</b> |
| 11.3.3    | Weitere Datensicherungsoptionen —                                                      | <b>305</b> |
| 11.3.4    | Exkurs: Datenschutz im Rahmen medizinischer Projekte —                                 | <b>307</b> |
| 11.4      | Bedrohungen im Internet —                                                              | <b>308</b> |
| 11.4.1    | Malware —                                                                              | <b>308</b> |
| 11.4.2    | Falsche Identität —                                                                    | <b>309</b> |
| 11.4.3    | Sabotage, Denial of Service (DoS) —                                                    | <b>310</b> |
| 11.5      | Kryptographie —                                                                        | <b>311</b> |
| 11.5.1    | Symmetrische Verfahren zur Verschlüsselung —                                           | <b>312</b> |
| 11.5.2    | Asymmetrische Verfahren zur Verschlüsselung —                                          | <b>313</b> |
| 11.5.3    | Kryptographische Hashfunktion (Prüfsumme) —                                            | <b>314</b> |
| 11.5.4    | Kryptoanalyse —                                                                        | <b>314</b> |
| 11.5.5    | Serververschlüsselung —                                                                | <b>315</b> |
| 11.6      | Public-Key-Infrastruktur, Elektronische Signaturen und digitaler Ausweis —             | <b>316</b> |
| 11.6.1    | Signaturgesetz (SiG) und Digitale Signatur —                                           | <b>316</b> |
| 11.6.2    | Zertifikat —                                                                           | <b>316</b> |
| 11.6.3    | Public-Key-Infrastruktur —                                                             | <b>317</b> |
| <b>12</b> | <b>Medizinische Dokumentation —</b>                                                    | <b>319</b> |
| 12.1      | Einführung in die medizinische Dokumentation —                                         | <b>319</b> |
| 12.1.1    | Definitionen und Einführung —                                                          | <b>319</b> |
| 12.1.2    | Rechtliche Grundlagen der medizinischen Dokumentation —                                | <b>320</b> |
| 12.1.3    | Weitere Dokumentationspflichten in der Medizin —                                       | <b>321</b> |
| 12.2      | Begriffs-, Ordnungs- und Klassifikationssysteme in der Medizin —                       | <b>321</b> |
| 12.2.1    | Grundbegriffe —                                                                        | <b>321</b> |
| 12.2.2    | Exkurs Medical Subject Headings (MeSH) —                                               | <b>323</b> |
| 12.2.3    | Ordnungs- und Klassifikationssysteme —                                                 | <b>324</b> |
| 12.3      | ICD-System —                                                                           | <b>325</b> |
| 12.3.1    | Struktur und Aufbau —                                                                  | <b>326</b> |
| 12.3.2    | Kreuz(+)-Stern(*)-Systematik —                                                         | <b>327</b> |
| 12.3.3    | Postkombination —                                                                      | <b>328</b> |
| 12.3.4    | ICD-O-3 (International Classification of Diseases for Oncology) —                      | <b>328</b> |
| 12.4      | OPS: Prozedurenkodierung in Deutschland —                                              | <b>329</b> |
| 12.4.1    | Struktur und Aufbau des OPS —                                                          | <b>329</b> |



|        |                                                                        |     |
|--------|------------------------------------------------------------------------|-----|
| 12.4.2 | Systematik und Einführung in alle Kapitel des OPS —                    | 330 |
| 12.4.3 | Kodieren von Prozeduren im DRG-System —                                | 332 |
| 12.5   | DRG-System —                                                           | 332 |
| 12.5.1 | Hintergrund —                                                          | 332 |
| 12.5.2 | Kodierung von Diagnosen und Prozeduren, Schweregrade und Partitionen — | 332 |
| 12.5.3 | Hauptdiagnosegruppe (MDC) und DRG-Kode —                               | 334 |
| 12.5.4 | Grouper —                                                              | 335 |
| 12.5.5 | Neue Untersuchungs- und Behandlungsmethoden (NUB) —                    | 337 |
| 12.6   | Weitere wichtige Klassifikationssysteme in der Medizin —               | 337 |
| 12.6.1 | SNOMED und SNOWMED-CT —                                                | 338 |
| 12.6.2 | AO-Klassifikation —                                                    | 339 |
| 12.6.3 | LOINC (Logical Observation Identifiers Names and Codes) —              | 340 |
| 12.6.4 | Intensivmedizinische Scores —                                          | 341 |
| 12.6.5 | Arzneimittelverzeichnisse —                                            | 341 |
| 12.7   | Sekundärverwendung —                                                   | 342 |

## Teil V Anwendungen der Medizinischen Informatik

|           |                                                                         |            |
|-----------|-------------------------------------------------------------------------|------------|
| <b>13</b> | <b>Evidenzbasierte Medizin (EbM) —</b>                                  | <b>347</b> |
| 13.1      | Was ist EbM? —                                                          | 347        |
| 13.2      | Klinische Studien —                                                     | 347        |
| 13.2.1    | Kohortenstudie —                                                        | 349        |
| 13.2.2    | Querschnittsstudie —                                                    | 350        |
| 13.2.3    | Fall-Kontroll-Studie —                                                  | 350        |
| 13.2.4    | Randomisierte kontrollierte Studie (randomized controlled trial, RCT) — | 351        |
| 13.2.5    | Diagnostische Studien —                                                 | 354        |
| 13.2.6    | Fallberichte und andere qualitative Studien —                           | 356        |
| 13.2.7    | Systematische Übersichtsarbeiten (Reviews) und Meta-Analysen —          | 356        |
| 13.3      | Exkurs: Phasen der Arzneimittelprüfung —                                | 357        |
| 13.3.1    | Phase I —                                                               | 357        |
| 13.3.2    | Phase II —                                                              | 357        |
| 13.3.3    | Phase III —                                                             | 358        |
| 13.3.4    | Zulassung —                                                             | 358        |
| 13.3.5    | Phase IV —                                                              | 358        |
| 13.4      | Umsetzung der EbM —                                                     | 359        |
| 13.4.1    | Ableitung einer beantwortbaren Frage —                                  | 359        |
| 13.4.2    | P – Patient oder Population —                                           | 359        |
| 13.4.3    | I – Intervention —                                                      | 360        |

|           |                                                                            |            |
|-----------|----------------------------------------------------------------------------|------------|
| 13.4.4    | C – Control (Kontrolle) —                                                  | 360        |
| 13.4.5    | O – Outcome (Ergebnis) —                                                   | 361        |
| 13.5      | Systematische Literaturrecherche in Datenbanken —                          | 361        |
| 13.5.1    | Kritische Bewertung der Literatur —                                        | 362        |
| 13.5.2    | Selection Bias —                                                           | 364        |
| 13.5.3    | Performance Bias —                                                         | 365        |
| 13.5.4    | Detection Bias —                                                           | 365        |
| 13.5.5    | Attrition Bias —                                                           | 365        |
| 13.5.6    | Publication Bias —                                                         | 366        |
| 13.5.7    | Jadad-Score —                                                              | 367        |
| 13.6      | Anwendung der vorhandenen Evidenz auf den klinischen Fall —                | 368        |
| 13.6.1    | Leitlinien —                                                               | 368        |
| 13.7      | Bewertung des Ergebnisses —                                                | 369        |
| <b>14</b> | <b>Informations- und Kommunikationssysteme im Gesundheitswesen —</b>       | <b>371</b> |
| 14.1      | Einführung —                                                               | 371        |
| 14.1.1    | Einteilung —                                                               | 371        |
| 14.1.2    | Usability —                                                                | 372        |
| 14.1.3    | Strukturen im Krankenhaus und KIS —                                        | 372        |
| 14.2      | Klinische Informationssysteme (KIS) —                                      | 374        |
| 14.2.1    | Bestandteile des KIS —                                                     | 374        |
| 14.2.2    | Konzepte einer KIS-Landschaft —                                            | 376        |
| 14.2.3    | Aufgaben und Herausforderungen —                                           | 376        |
| 14.2.4    | Auswirkungen bzw. Nutzen eines KIS —                                       | 378        |
| 14.3      | Patientendatenverwaltungssysteme (PAS) —                                   | 379        |
| 14.3.1    | Prozessschritte im KIS bei stationärer und teilstationärer<br>Behandlung — | 379        |
| 14.3.2    | Prozessschritte im KIS bei ambulanter Behandlung —                         | 380        |
| 14.3.3    | Eigenschaften und Bestandteile eines PAS —                                 | 381        |
| 14.4      | Klinischer Arbeitsplatz —                                                  | 382        |
| 14.4.1    | Elektronische Patientenakte (EPA) —                                        | 383        |
| 14.4.2    | Klinische Dokumentation und Befundung —                                    | 383        |
| 14.4.3    | Arztbriefe —                                                               | 384        |
| 14.4.4    | Weitere Funktionen im klinischen Arbeitsplatz —                            | 384        |
| 14.4.5    | Benchmarking von Klinischen<br>Informationssystemen/Arbeitsplätzen —       | 385        |
| 14.5      | Abteilungs- und Spezialsysteme —                                           | 385        |
| 14.5.1    | Arztpraxis- und Ambulanzinformationssysteme —                              | 387        |
| 14.6      | Administrative Systeme —                                                   | 388        |
| 14.7      | Arzneimitteltherapiesysteme (AMTS) —                                       | 389        |
| 14.7.1    | Arzneimittelprozess —                                                      | 389        |
| 14.7.2    | Risiken im Arzneimittelprozess —                                           | 389        |

- 14.7.3 Elektronische Verordnungsunterstützung durch Arzneimitteltherapiesysteme (AMTS) — **390**
- 14.7.4 Apotheke — **391**
- 14.8 Workflows und Integrierte Behandlungspfade — **391**
- 14.8.1 Workflow Engines und Rules Engines (Regelwerkzeug) in der Medizin — **392**
- 14.8.2 Arden-Syntax — **393**
- 14.8.3 Integrierte Behandlungspfade (Clinical Pathways) — **393**
- 14.9 Radiologie (RIS/PACS) — **394**
- 14.9.1 Picture Archiving and Communication System (PACS) — **396**
- 14.9.2 Qualitätssicherung — **399**
- 14.9.3 Detector — **399**
- 14.9.4 Monitore — **399**
- 14.9.5 Datensicherheit — **399**
  
- 15 Standards und Schnittstellen — 401**
- 15.1 HL7 — **401**
- 15.1.1 Historie — **401**
- 15.1.2 Nachrichtentypen — **402**
- 15.1.3 Nachrichtenaufbau — **402**
- 15.1.4 Beispiel für eine HL7-Nachricht — **403**
- 15.2 DICOM — **404**
- 15.2.1 Historie — **406**
- 15.2.2 Aufbau und Eigenschaften — **407**
- 15.2.3 Information Object Definition — **407**
- 15.2.4 DICOM Message Service Element — **408**
- 15.2.5 Service-Object Pair (SOP) — **408**
- 15.2.6 Kurzübersicht wichtiger DICOM-Felder — **409**
- 15.2.7 DICOM File Sets — **410**
- 15.2.8 Beispiel der Nomenklatur/DICOM an einem typischen C-Bögen — **410**
- 15.2.9 DICOM Conformance Statement — **411**
- 15.3 IHE — **412**
- 15.3.1 Historie — **412**
- 15.3.2 Aufbau — **412**
- 15.3.3 Connection Marathon — **413**
- 15.4 Praxissoftwareschnittstellen — **413**
- 15.4.1 xDT — **414**
- 15.4.2 Behandlungsdatentransfer (BDT) — **414**
- 15.4.3 Gerätedatentransfer (GDT) — **414**
- 15.4.4 Abrechnungsdatentransfer (ADT) — **415**
- 15.4.5 Labordatentransfer (LDT) — **416**
- 15.4.6 Clinical Document Architecture (CDA) — **416**

**16 Medizintechnik — 417**

- 16.1 Einführung zum rechtlichen und regulatorischen Rahmen — **417**
- 16.1.1 Regulation im medizintechnischen Bereich — **417**
- 16.1.2 Herausforderungen der Medizintechnik — **417**
- 16.1.3 Ansätze der gesetzlichen Regulierungen — **418**
- 16.1.4 Grundprinzipien der gesetzlichen Regulationen — **419**
- 16.2 Medizinprodukterecht in Europa und Deutschland — **421**
- 16.2.1 Medizinprodukt – Definition — **422**
- 16.2.2 Validierung – Definition — **423**
- 16.2.3 Verifizierung – Definition — **424**
- 16.2.4 Konformitätsnachweis, New Approach — **424**
- 16.2.5 Grundlegende Anforderungen — **425**
- 16.3 Harmonisierte Normen, Gemeinsame Technische Spezifikationen — **426**
- 16.3.1 Anforderungen an den Stand der Technik (§8 MPG) — **426**
- 16.3.2 Funktionale Sicherheit — **426**
- 16.3.3 Patientensicherheit — **427**
- 16.3.4 Vernetzte Medizinische Systeme — **427**
- 16.3.5 Bedeutung der harmonisierten Normen — **428**
- 16.4 MPSV und MPBetreibV: Überwachung und Schutz vor Risiken — **428**
- 16.4.1 Allgemeine Anforderungen nach §2 MPBetreibV — **428**
- 16.4.2 Vorkommnis (nach §2 MPSV) — **429**
- 16.5 Software als Medizinprodukt (EN 62304) — **429**
- 16.5.1 Software Definition — **430**
- 16.5.2 Risikoklassifikationen von Software — **432**
- 16.5.3 Lebenszyklus — **433**
- 16.5.4 Spezifikation — **434**
- 16.5.5 Design und Realisierung — **434**
- 16.5.6 Verifizierung und Validierung von Software — **435**
- 16.5.7 Wartungs- und Vermarktungsprozess — **436**
- 16.5.8 Anhang: Apps — **437**
- 16.6 Risikomanagement (DIN EN ISO 14971:2013) — **438**
- 16.6.1 Der Risikobegriff — **438**
- 16.6.2 Risikomatrix — **438**
- 16.6.3 Risikomanagement — **439**
- 16.6.4 Exkurs: Hilfsmittel und Methoden der Risikoanalyse — **441**
- 16.7 Gebrauchstauglichkeit – Anwenderrisiko – Ergonomieprozess — **442**
- 16.8 Netzwerke im Gesundheitswesen und DIN EN 80001-1; VDE 0756-1:2011-11 — **443**

|           |                                                                                                       |
|-----------|-------------------------------------------------------------------------------------------------------|
| <b>17</b> | <b>Telemedizin — 447</b>                                                                              |
| 17.1      | Einführung — 447                                                                                      |
| 17.1.1    | Entwicklung der Netze und Ausblicke für die Telemedizin — 448                                         |
| 17.1.2    | Definitionen der Telemedizin — 449                                                                    |
| 17.1.3    | Wichtige Anwendungen und Abgrenzungen in der Telemedizin — 450                                        |
| 17.2      | Rechtliche Aspekte und regulatorisches Umfeld — 451                                                   |
| 17.2.1    | Geltendes Recht — 451                                                                                 |
| 17.2.2    | Datenschutz in der Telemedizin — 451                                                                  |
| 17.2.3    | Verschlüsselung — 452                                                                                 |
| 17.2.4    | „Fernbehandlungsverbot“ — 452                                                                         |
| 17.2.5    | Herausforderung Cloud-Computing — 453                                                                 |
| 17.2.6    | Herausforderung Smartphones und Apps — 454                                                            |
| 17.3      | Ausgewählte technische Aspekte — 455                                                                  |
| 17.3.1    | Multiple Access Control (MAC) — 457                                                                   |
| 17.3.2    | Wireless Body Area Network (WBAN) — 459                                                               |
| 17.3.3    | Modulation und Netzwerke — 459                                                                        |
| 17.3.4    | Drahtlose Vernetzung — 461                                                                            |
| 17.3.5    | Ausblick — 463                                                                                        |
| 17.4      | Anwendungen/Projekte (Auswahl) — 464                                                                  |
| 17.4.1    | Gesellschaft für Telematik (gematik) nach §291b SGB V — 464                                           |
| 17.4.2    | Teleradiologie — 465                                                                                  |
| 17.4.3    | Telenotfallmedizin — 467                                                                              |
| 17.4.4    | Telemonitoring — 468                                                                                  |
| 17.4.5    | Apps — 469                                                                                            |
| 17.4.6    | Trusted Cloud — 471                                                                                   |
| 17.4.7    | Body sensor networks (WBANS)/Personal Area Networks (PANS) und<br>Ambient assisted living (AAL) — 471 |

|                                  |
|----------------------------------|
| <b>Sachwortverzeichnis — 475</b> |
|----------------------------------|
